# Supplementary material for: Diagnosis of latent tuberculosis infection is associated with reduced HIV viral load and lower risk for opportunistic infections in people living with HIV
Source: PLoS Biol. 2020 Dec 7;18(12):e3000963. doi: 10.1371/journal.pbio.3000963 (PMC7721132; doi:10.1371/journal.pbio.3000963)
Supplement: S1 Data — (XLSX) [file pbio.3000963.s003.xlsx]

## Sheet: FigA
Var1	Var2	Freq
Quantiferon in-tube	2002	0
Quantiferon liquid	2002	0
Tb spot	2002	0
Other	2002	0
Unknown	2002	0
Quantiferon in-tube	2006	2
Quantiferon liquid	2006	0
Tb spot	2006	3
Other	2006	0
Unknown	2006	1
Quantiferon in-tube	2007	5
Quantiferon liquid	2007	1
Tb spot	2007	19
Other	2007	0
Unknown	2007	1
Quantiferon in-tube	2008	121
Quantiferon liquid	2008	4
Tb spot	2008	151
Other	2008	0
Unknown	2008	1
Quantiferon in-tube	2009	190
Quantiferon liquid	2009	3
Tb spot	2009	186
Other	2009	3
Unknown	2009	1
Quantiferon in-tube	2010	151
Quantiferon liquid	2010	5
Tb spot	2010	154
Other	2010	2
Unknown	2010	5
Quantiferon in-tube	2011	218
Quantiferon liquid	2011	2
Tb spot	2011	157
Other	2011	1
Unknown	2011	8
Quantiferon in-tube	2012	208
Quantiferon liquid	2012	2
Tb spot	2012	137
Other	2012	1
Unknown	2012	4
Quantiferon in-tube	2013	230
Quantiferon liquid	2013	1
Tb spot	2013	154
Other	2013	0
Unknown	2013	6
Quantiferon in-tube	2014	243
Quantiferon liquid	2014	4
Tb spot	2014	136
Other	2014	1
Unknown	2014	4
Quantiferon in-tube	2015	222
Quantiferon liquid	2015	2
Tb spot	2015	146
Other	2015	1
Unknown	2015	3
Quantiferon in-tube	2016	173
Quantiferon liquid	2016	13
Tb spot	2016	131
Other	2016	0
Unknown	2016	5
Quantiferon in-tube	2017	159
Quantiferon liquid	2017	23
Tb spot	2017	122
Other	2017	0
Unknown	2017	3
Quantiferon in-tube	2018	132
Quantiferon liquid	2018	17
Tb spot	2018	94
Other	2018	1
Unknown	2018	7
Quantiferon in-tube	2019	48
Quantiferon liquid	2019	9
Tb spot	2019	31
Other	2019	0
Unknown	2019	8

## Sheet: FigB
Var1	Freq
1983	1
1984	1
1985	3
1986	1
1987	3
1988	2
1989	14
1990	64
1991	579
1992	955
1993	941
1994	987
1995	912
1996	935
1997	1034
1998	921
1999	629
2000	477
2001	396
2002	397
2003	429
2004	498
2005	583
2006	406
2007	439
2008	469
2009	269
2010	233
2011	178
2012	144
2013	116
2014	95
2015	59
2016	78
2017	27
2018	37
2019	14

## Sheet: FigC
Var1	Freq
1	11057
2	1969
3	468
4	112
5	41
6	11
7	12
8	4
9	1

## Sheet: FigD
Var1	Freq
-13	1
-10	1
-9	1
-8	4
-7	7
-6	6
-5	8
-4	18
-3	27
-2	47
-1	263
0	8320
1	1652
2	865
3	544
4	384
5	341
6	285
7	226
8	143
9	127
10	83
11	71
12	56
13	23
14	33
15	35
16	31
17	17
18	14
19	11
20	8
21	3
22	6
23	1
24	3
25	1
26	3
27	2
28	1
29	2
34	1

## Sheet: FigE
Var1	Var2	Freq
PulmonaryTB	1982	0
ExtrapulmonaryTB	1982	1
PulmonaryTB	1984	0
ExtrapulmonaryTB	1984	2
PulmonaryTB	1985	1
ExtrapulmonaryTB	1985	1
PulmonaryTB	1986	5
ExtrapulmonaryTB	1986	3
PulmonaryTB	1987	7
ExtrapulmonaryTB	1987	9
PulmonaryTB	1988	14
ExtrapulmonaryTB	1988	17
PulmonaryTB	1989	24
ExtrapulmonaryTB	1989	18
PulmonaryTB	1990	33
ExtrapulmonaryTB	1990	27
PulmonaryTB	1991	30
ExtrapulmonaryTB	1991	13
PulmonaryTB	1992	27
ExtrapulmonaryTB	1992	19
PulmonaryTB	1993	35
ExtrapulmonaryTB	1993	24
PulmonaryTB	1994	37
ExtrapulmonaryTB	1994	24
PulmonaryTB	1995	18
ExtrapulmonaryTB	1995	11
PulmonaryTB	1996	19
ExtrapulmonaryTB	1996	15
PulmonaryTB	1997	25
ExtrapulmonaryTB	1997	17
PulmonaryTB	1998	21
ExtrapulmonaryTB	1998	10
PulmonaryTB	1999	26
ExtrapulmonaryTB	1999	10
PulmonaryTB	2000	16
ExtrapulmonaryTB	2000	9
PulmonaryTB	2001	17
ExtrapulmonaryTB	2001	11
PulmonaryTB	2002	18
ExtrapulmonaryTB	2002	12
PulmonaryTB	2003	16
ExtrapulmonaryTB	2003	5
PulmonaryTB	2004	17
ExtrapulmonaryTB	2004	13
PulmonaryTB	2005	13
ExtrapulmonaryTB	2005	14
PulmonaryTB	2006	15
ExtrapulmonaryTB	2006	13
PulmonaryTB	2007	13
ExtrapulmonaryTB	2007	8
PulmonaryTB	2008	13
ExtrapulmonaryTB	2008	10
PulmonaryTB	2009	16
ExtrapulmonaryTB	2009	11
PulmonaryTB	2010	20
ExtrapulmonaryTB	2010	11
PulmonaryTB	2011	9
ExtrapulmonaryTB	2011	8
PulmonaryTB	2012	5
ExtrapulmonaryTB	2012	2
PulmonaryTB	2013	16
ExtrapulmonaryTB	2013	4
PulmonaryTB	2014	4
ExtrapulmonaryTB	2014	5
PulmonaryTB	2015	3
ExtrapulmonaryTB	2015	3
PulmonaryTB	2016	4
ExtrapulmonaryTB	2016	2
PulmonaryTB	2017	7
ExtrapulmonaryTB	2017	3
PulmonaryTB	2018	1
ExtrapulmonaryTB	2018	1
PulmonaryTB	2019	1
ExtrapulmonaryTB	2019	1

## Sheet: FigF
Var1	Freq
-37	1
-28	2
-27	1
-26	1
-25	1
-24	7
-23	4
-22	10
-21	8
-20	7
-19	21
-18	17
-17	21
-16	33
-15	38
-14	45
-13	60
-12	75
-11	69
-10	86
-9	122
-8	162
-7	172
-6	237
-5	359
-4	467
-3	650
-2	1038
-1	1786
0	4704
1	1700
2	1260
3	812
4	553
5	385
6	256
7	239
8	176
9	145
10	114
11	100
12	86
13	65
14	51
15	39
16	28
17	20
18	29
19	22
20	15
21	16
22	11
23	9
24	2
25	2
26	3
27	1
28	1

## Sheet: FigG
time	TB	OI
-13.1	1	NA
-10	1	2
-9.4	1	4
-7.9	3	7
-7.7	1	5
-7.4	2	9
-7.3	2	1
-7.2	1	6
-7.1	1	3
-6.8	1	6
-6.4	1	8
-6.2	1	7
-5.8	2	11
-5.5	1	5
-5.4	2	5
-5.2	2	15
-5.1	1	6
-5	1	11
-4.9	1	6
-4.8	1	12
-4.7	1	14
-4.6	2	10
-4.5	1	15
-4.4	2	12
-4.2	2	19
-4	4	15
-3.9	2	17
-3.8	3	11
-3.7	1	12
-3.4	4	14
-3.3	1	9
-3.2	3	17
-3.1	5	16
-3	2	22
-2.9	2	21
-2.8	3	18
-2.7	3	34
-2.6	7	25
-2.5	1	19
-2.3	3	33
-2.1	4	31
-2	5	41
-1.9	1	32
-1.8	7	35
-1.7	10	38
-1.6	5	33
-1.5	10	55
-1.4	10	59
-1.3	10	79
-1.2	10	58
-1.1	17	63
-1	22	91
-0.9	21	90
-0.8	23	100
-0.7	19	95
-0.6	44	114
-0.5	50	142
-0.4	57	253
-0.3	73	207
-0.2	109	463
-0.1	343	1010
0	6831	2567
0.1	113	300
0.2	142	187
0.3	144	184
0.4	209	165
0.5	609	174
0.6	346	179
0.7	153	159
0.8	98	147
0.9	119	173
1	182	179
1.1	167	169
1.2	114	140
1.3	71	157
1.4	105	171
1.5	110	120
1.6	125	137
1.7	82	144
1.8	78	117
1.9	74	137
2	101	153
2.1	80	133
2.2	75	131
2.3	57	134
2.4	80	106
2.5	76	121
2.6	70	123
2.7	47	119
2.8	47	114
2.9	51	108
3	55	100
3.1	56	132
3.2	49	109
3.3	58	110
3.4	47	102
3.5	50	95
3.6	47	84
3.7	42	99
3.8	38	95
3.9	37	90
4	43	102
4.1	27	89
4.2	53	92
4.3	27	84
4.4	39	89
4.5	27	81
4.6	32	67
4.7	32	87
4.8	44	93
4.9	29	65
5	34	90
5.1	33	92
5.2	34	71
5.3	30	74
5.4	30	67
5.5	44	69
5.6	28	99
5.7	25	64
5.8	25	60
5.9	29	79
6	27	59
6.1	23	58
6.2	35	51
6.3	34	56
6.4	28	65
6.5	29	70
6.6	25	53
6.7	25	46
6.8	21	55
6.9	15	42
7	22	46
7.1	23	50
7.2	16	38
7.3	27	56
7.4	8	48
7.5	15	45
7.6	24	47
7.7	15	38
7.8	16	41
7.9	23	48
8	11	43
8.1	12	35
8.2	8	36
8.3	15	42
8.4	10	29
8.5	14	40
8.6	11	31
8.7	12	37
8.8	14	28
8.9	13	31
9	19	30
9.1	13	27
9.2	12	22
9.3	15	30
9.4	11	31
9.5	7	22
9.6	15	28
9.7	7	28
9.8	9	25
9.9	7	27
10	11	30
10.1	3	29
10.2	10	20
10.3	6	30
10.4	8	10
10.5	6	38
10.6	8	18
10.7	6	27
10.8	7	18
10.9	3	21
11	8	19
11.1	10	21
11.2	5	22
11.3	7	18
11.4	6	21
11.5	6	17
11.6	6	14
11.7	5	24
11.8	5	15
11.9	13	16
12	7	17
12.1	3	11
12.2	6	11
12.3	3	6
12.4	1	11
12.5	1	14
12.6	3	15
12.7	3	14
12.8	3	11
12.9	5	8
13	5	9
13.1	1	12
13.2	3	4
13.3	4	12
13.4	2	11
13.5	1	11
13.6	2	18
13.7	4	5
13.8	1	5
13.9	6	7
14	2	8
14.1	3	8
14.2	9	15
14.3	5	7
14.4	5	11
14.5	1	9
14.6	3	16
14.7	3	7
14.8	2	6
14.9	2	7
15	4	8
15.1	3	7
15.2	2	12
15.3	1	6
15.4	5	5
15.5	2	10
15.6	1	4
15.7	5	4
15.8	6	6
15.9	1	8
16	3	10
16.1	8	4
16.2	1	6
16.3	2	5
16.4	2	8
16.5	1	12
16.6	5	5
16.7	2	5
16.8	2	4
16.9	1	3
17	1	2
17.1	2	4
17.3	1	6
17.4	4	3
17.5	1	5
17.7	3	3
17.8	3	3
17.9	1	2
18	3	2
18.2	2	7
18.3	3	NA
18.6	2	5
18.7	2	2
18.8	1	1
18.9	1	5
19	1	6
19.1	1	2
19.2	1	6
19.4	2	5
19.6	1	5
19.7	1	1
19.8	1	3
20	1	3
20.2	1	6
20.6	1	1
20.8	1	1
20.9	1	4
21.3	1	1
21.6	1	1
21.8	1	3
22	2	NA
22.2	2	NA
22.5	1	3
23.2	1	1
24.2	1	NA
24.3	1	1
24.7	2	1
25.2	1	NA
25.3	1	NA
26	1	2
26.1	1	NA
26.2	1	1
28.2	1	NA
29.3	2	NA
33.7	1	NA
-36.2	NA	1
-29.1	NA	1
-26.8	NA	1
-26.6	NA	1
-24.8	NA	1
-22.4	NA	2
-22	NA	1
-21.6	NA	1
-21.5	NA	2
-21.3	NA	1
-21.2	NA	1
-21.1	NA	1
-21	NA	2
-20.8	NA	1
-20.6	NA	1
-20.4	NA	1
-20.1	NA	1
-19.9	NA	2
-19.8	NA	1
-19.5	NA	2
-19.4	NA	2
-18.9	NA	2
-18.8	NA	1
-18.6	NA	1
-18.1	NA	1
-18	NA	4
-17.9	NA	1
-17.6	NA	1
-17.4	NA	1
-17.3	NA	4
-17.2	NA	1
-17	NA	2
-16.9	NA	1
-16.8	NA	1
-16.2	NA	1
-16.1	NA	1
-16	NA	1
-15.7	NA	1
-15.5	NA	1
-15.3	NA	1
-15.2	NA	2
-15	NA	3
-14.9	NA	1
-14.8	NA	1
-14.7	NA	1
-14.6	NA	1
-14.4	NA	3
-14.3	NA	1
-14.2	NA	1
-14	NA	2
-13.9	NA	3
-13.8	NA	1
-13.6	NA	3
-13.5	NA	1
-13.4	NA	1
-13.3	NA	1
-13.2	NA	2
-13	NA	6
-12.9	NA	3
-12.8	NA	2
-12.7	NA	1
-12.6	NA	1
-12.4	NA	6
-12.1	NA	2
-12	NA	1
-11.8	NA	4
-11.7	NA	5
-11.6	NA	3
-11.5	NA	2
-11.4	NA	3
-11.3	NA	2
-11.2	NA	8
-11.1	NA	3
-11	NA	1
-10.9	NA	3
-10.8	NA	3
-10.7	NA	6
-10.6	NA	2
-10.5	NA	4
-10.4	NA	3
-10.3	NA	2
-10.2	NA	3
-10.1	NA	2
-9.9	NA	4
-9.8	NA	1
-9.7	NA	2
-9.6	NA	4
-9.5	NA	3
-9.3	NA	3
-9.2	NA	2
-9.1	NA	4
-9	NA	4
-8.9	NA	1
-8.8	NA	10
-8.7	NA	8
-8.6	NA	1
-8.5	NA	1
-8.4	NA	10
-8.3	NA	6
-8.2	NA	7
-8.1	NA	2
-8	NA	8
-7.8	NA	5
-7.6	NA	6
-7.5	NA	9
-7	NA	2
-6.9	NA	2
-6.7	NA	6
-6.6	NA	11
-6.5	NA	6
-6.3	NA	6
-6.1	NA	8
-6	NA	7
-5.9	NA	7
-5.7	NA	8
-5.6	NA	13
-5.3	NA	13
-4.3	NA	14
-4.1	NA	18
-3.6	NA	14
-3.5	NA	17
-2.4	NA	20
-2.2	NA	30
17.2	NA	7
17.6	NA	6
18.1	NA	4
18.4	NA	7
18.5	NA	5
19.3	NA	3
19.5	NA	6
19.9	NA	5
20.1	NA	1
20.3	NA	7
20.4	NA	5
20.5	NA	1
20.7	NA	3
21	NA	1
21.2	NA	1
21.4	NA	1
21.5	NA	3
21.7	NA	4
21.9	NA	1
22.3	NA	1
22.7	NA	2
22.8	NA	1
22.9	NA	1
23.1	NA	1
23.3	NA	1
23.5	NA	3
23.6	NA	1
23.8	NA	2
24	NA	1
24.1	NA	1
24.4	NA	2
24.8	NA	2
25	NA	2
25.1	NA	1
25.5	NA	1
25.6	NA	2
25.7	NA	1
25.8	NA	1
26.3	NA	1
26.6	NA	1
26.7	NA	1
26.8	NA	2
27.1	NA	1
27.2	NA	1
27.5	NA	3
27.6	NA	1
27.7	NA	1
28.3	NA	1
28.4	NA	2
28.6	NA	2
29.4	NA	1
29.8	NA	1
30	NA	1
30.7	NA	2
31.3	NA	1
31.5	NA	1

## Sheet: FigH
Var1	Freq
-28	1
-26	1
-25	1
-24	2
-22	2
-21	2
-20	1
-19	3
-18	3
-17	2
-16	7
-15	10
-14	9
-13	11
-12	15
-11	20
-10	24
-9	33
-8	46
-7	45
-6	69
-5	85
-4	121
-3	181
-2	271
-1	511
0	1196
1	245
2	213
3	146
4	98
5	62
6	50
7	32
8	24
9	29
10	16
11	15
12	7
13	11
14	6
15	4
16	1
17	4
19	2
20	2
22	3
26	1
27	1

## Sheet: FigI
Var1	Freq
-24	1
-20	1
-19	2
-18	1
-17	1
-16	5
-15	3
-14	5
-13	6
-12	8
-11	3
-10	8
-9	11
-8	12
-7	16
-6	22
-5	29
-4	55
-3	82
-2	115
-1	182
0	611
1	181
2	132
3	71
4	48
5	35
6	17
7	18
8	11
9	4
10	6
11	3
12	5
13	3
14	4
18	3

## Sheet: FigJ
Var1	Freq
-28	1
-24	1
-23	2
-22	1
-21	2
-19	2
-18	4
-17	5
-16	4
-15	8
-14	5
-13	7
-12	14
-11	9
-10	8
-9	13
-8	18
-7	28
-6	32
-5	53
-4	49
-3	59
-2	107
-1	147
0	290
1	146
2	112
3	73
4	48
5	45
6	30
7	28
8	15
9	23
10	23
11	11
12	15
13	7
14	4
15	4
16	6
18	8
19	3
20	3
21	1
22	1
23	2
28	1

[truncated: 1 more sheets: FigK]
